# Supplementary material for: Probing structural and dynamic properties of MAPbCl3 hybrid perovskite using Mn2+ EPR
Source: Royal Society of Chemistry journal article supplement (doi:10.1039/d4dt00116h), 2024-01-01
Supplement: d4dt00116h1.pdf [file d4dt00116h1.pdf]

## Supplementary information

# Probing structural and dynamic properties of MAPbCl<sub>3</sub> hybrid perovskite using Mn<sup>2+</sup> EPR

Gediminas Usevičius, Justinas Turčak, Yuxuan Zhang, Andrea Eggeling, Žyginta Einorytė, Michael Allan Hope, Šarūnas Svirskas, Daniel Klose, Vidmantas Kalendra, Kęstutis Aidas, Gunnar Jeschke, Jūras Banys, and Mantas Šimėnas\*

E-mail: [mantas.simenas@ff.vu.lt](mailto:mantas.simenas@ff.vu.lt)

## Additional DFT data

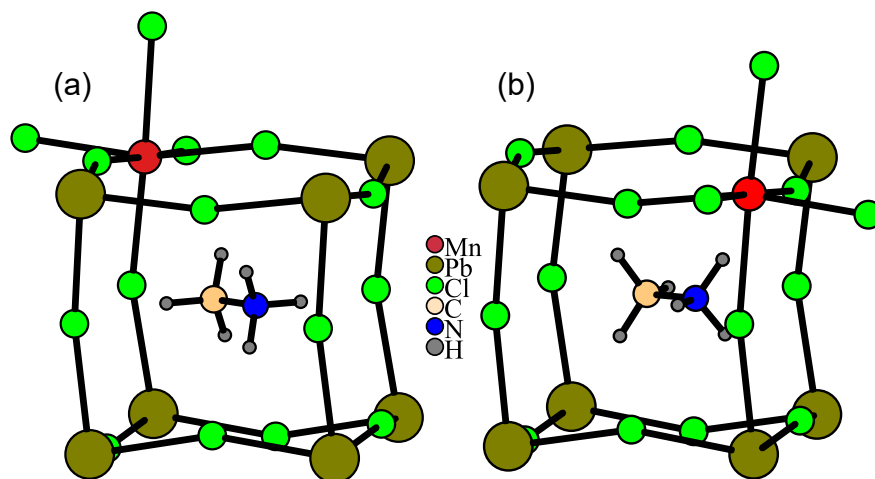

Figure S1: DFT structure of MAPbCl<sub>3</sub>:Mn used for calculation of the rotation potentials, when the Mn<sup>2+</sup> ion is close to the (a) methyl and (b) ammonium group of the MA cation.

## Initial sample characterization

The room-temperature PXRD pattern of the  $\text{MAPbCl}_3:\text{Mn}$  sample reveals that this compound has a cubic symmetry at room temperature (Figure S2a). The obtained pattern is in a good agreement with that of the pure  $\text{MAPbCl}_3$  compound.<sup>1</sup>

The room-temperature Raman spectrum of the  $\text{MAPbCl}_3:\text{Mn}$  sample is presented in Figure S2b showing Raman bands originating from MA cations. The measured spectrum corresponds to the spectrum of the undoped  $\text{MAPbCl}_3$  compound as reported in Ref. 2.

The room-temperature  $^1\text{H}$  solid-state NMR spectrum of  $\text{MAPbCl}_3:\text{Mn}$  is presented in Figure S2c. The obtained spectrum is identical to that of the pure  $\text{MAPbCl}_3$ .

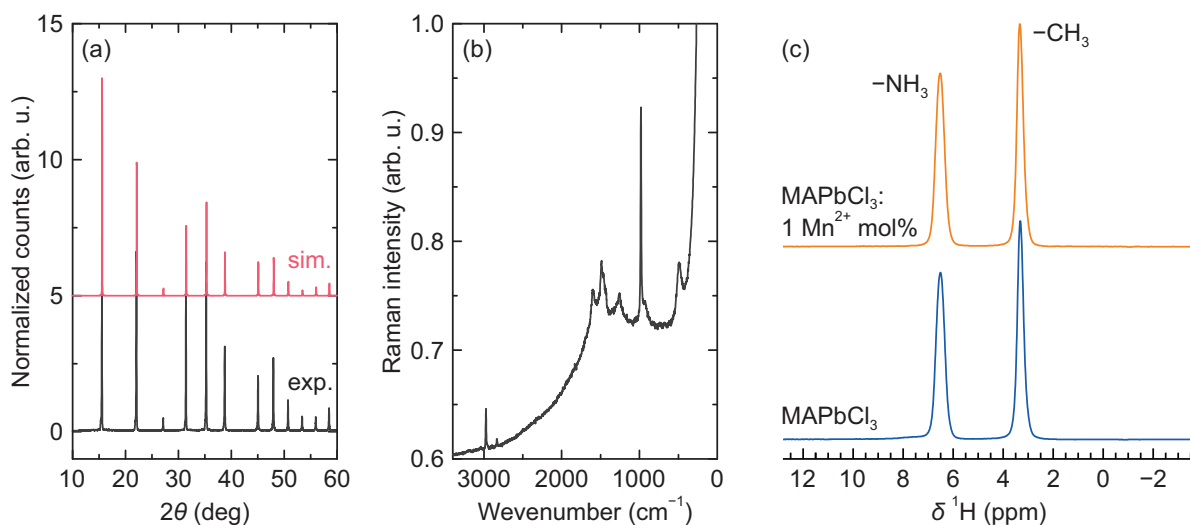

Figure S2: (a) Room-temperature PXRD of  $\text{MAPbCl}_3:\text{Mn}$ . The simulated spectrum is presented for comparison. (b) Room-temperature Raman spectrum of  $\text{MAPbCl}_3:\text{Mn}$ . (c)  $^1\text{H}$  NMR spectra of  $\text{MAPbCl}_3:\text{Mn}$  and undoped  $\text{MAPbCl}_3$  obtained at room temperature, 11.7 T, 40 s recycle delay, and 50 kHz magic-angle spinning rate.

## Additional EPR data

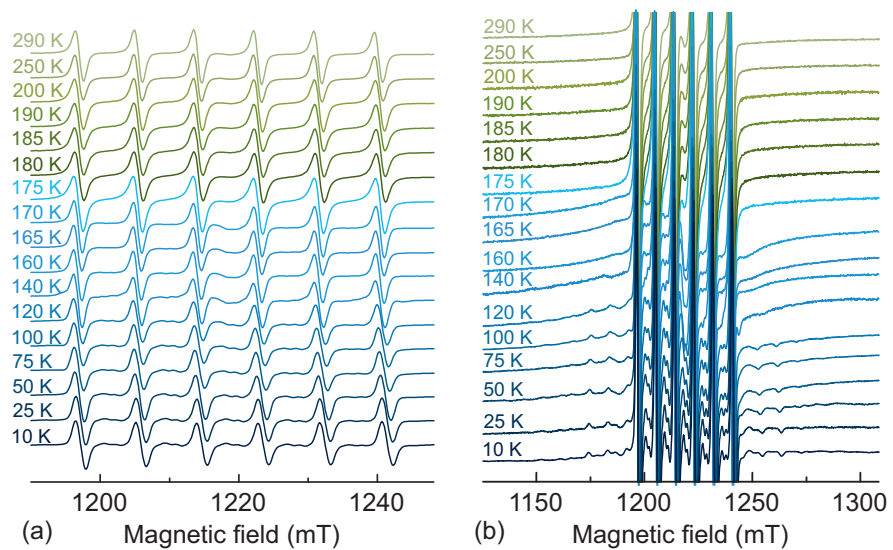

Figure S3: Normalized Q-band EPR spectra of MAPbCl<sub>3</sub>:Mn recorded at different temperatures. Emphasis on the (a) central and (b) outer transitions.

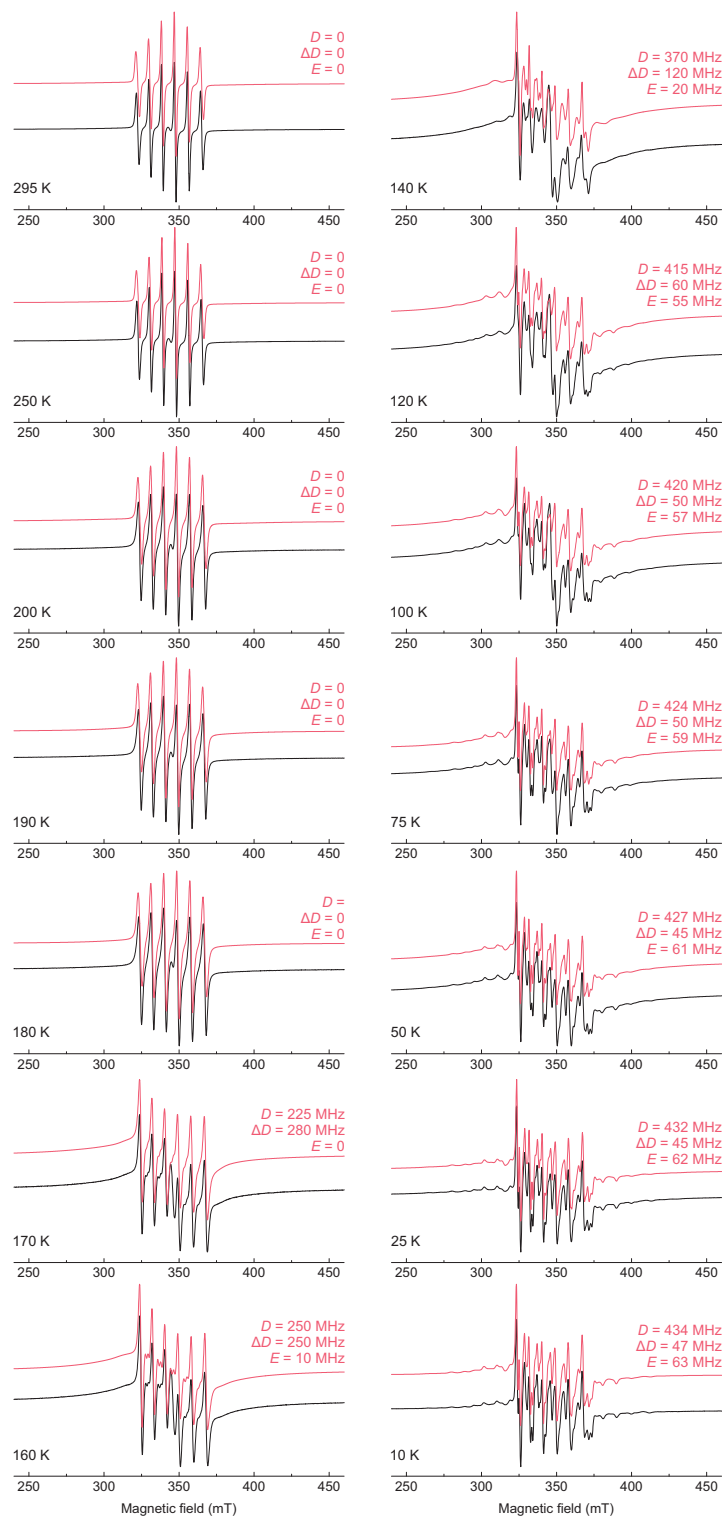

Figure S4: Simulations (red) of the experimental (black) X-band CW EPR spectra of  $\text{MAPbCl}_3:\text{Mn}$  obtained at different temperature. Fine structure parameters used for simulations are indicated above the simulated spectra. The simulations also include a broad background line assigned to the clustered  $\text{Mn}^{2+}$  species.

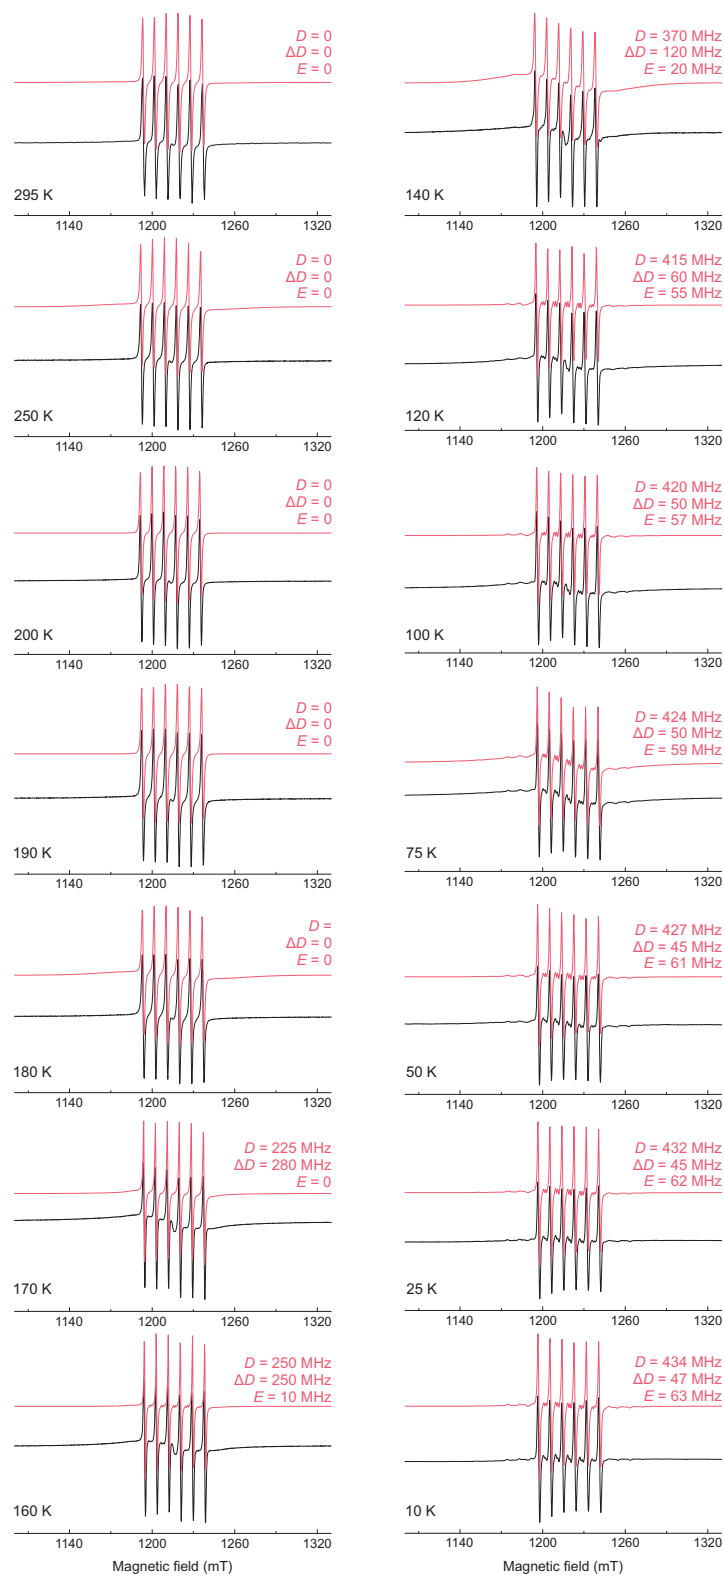

Figure S5: Simulations (red) of the experimental (black) Q-band CW EPR spectra of  $\text{MAPbCl}_3\text{:Mn}$  obtained at different temperature. Fine structure parameters used for simulations are indicated above the simulated spectra. The simulations also include a broad background line assigned to the clustered  $\text{Mn}^{2+}$  species.

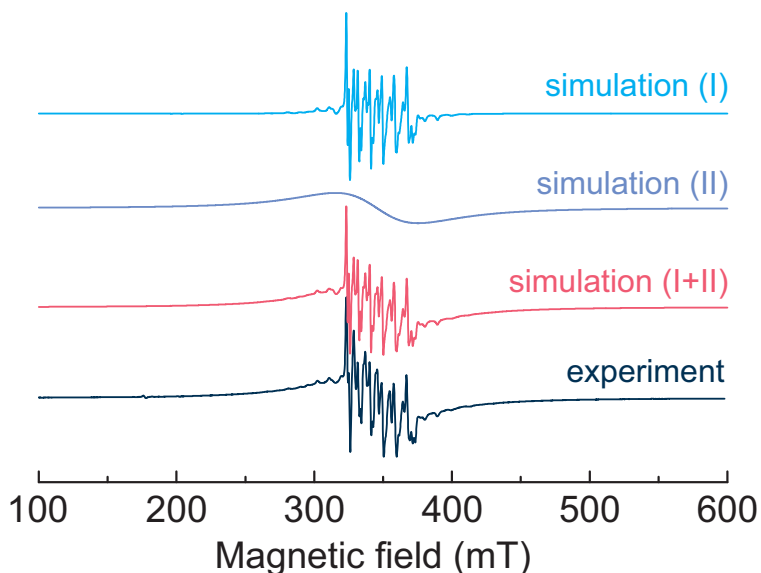

Figure S6: Simulation of the X-band CW EPR spectrum of MAPbCl<sub>3</sub>:Mn recorded at 50 K, where both signals are well visible. The best agreement with the experiment is obtained by adding a broad EPR line (II) to the Mn<sup>2+</sup> spectrum (I). The intensity of the broad line is about 10× higher compared to the intensity of the well-resolved Mn<sup>2+</sup> spectrum.

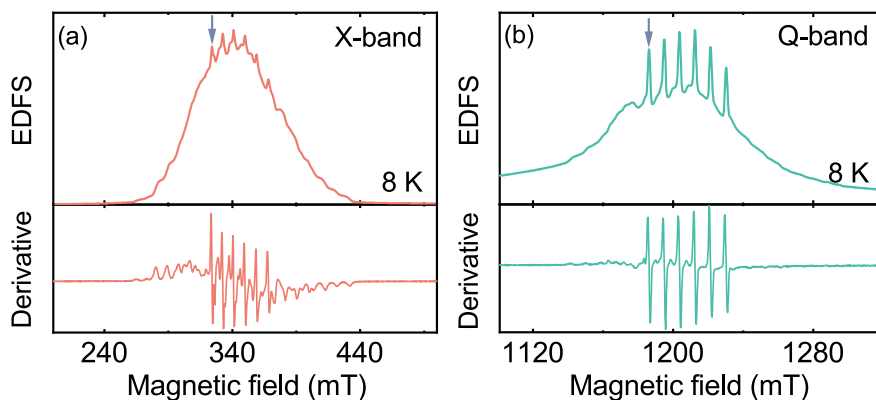

Figure S7: (a) X- and (b) Q-band EDFS spectra of MAPbCl<sub>3</sub>:Mn obtained at 8 K. The corresponding first derivatives of the spectra are also presented. Arrows indicate the field position for the pulsed EPR experiments.

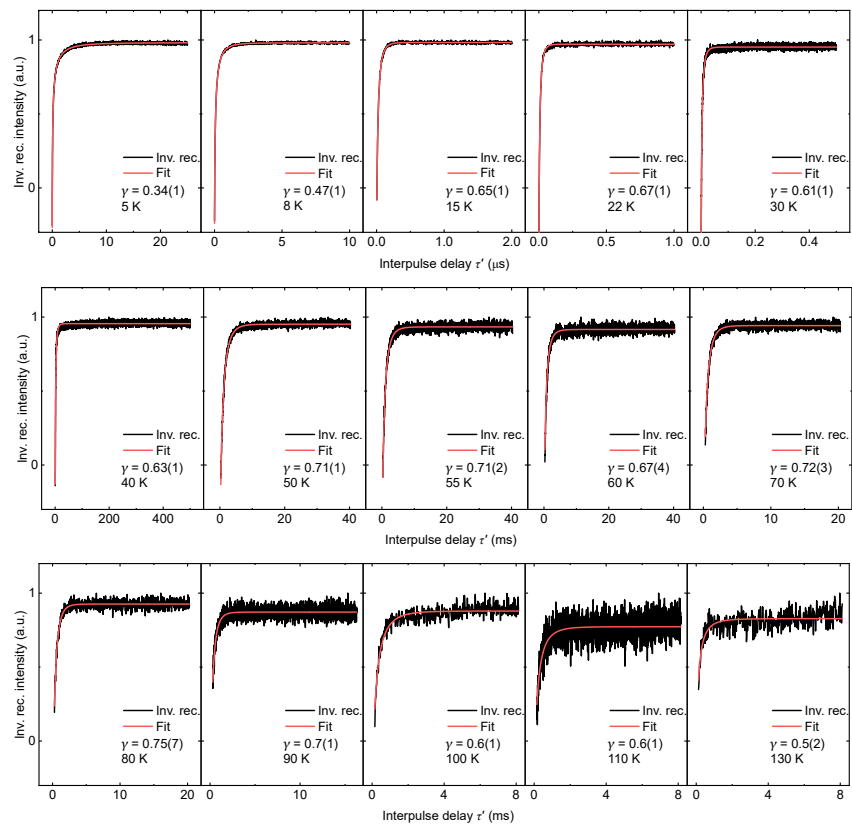

Figure S8: Inversion recovery data of  $\text{MAPbCl}_3\text{:Mn}$  obtained at X-band (324.9 mT) frequency and different temperatures. Red curves indicate the best fits to a stretched exponential recovery function:  $V = a(1 - b \exp(-(\tau'/T_1)^\gamma))$ .



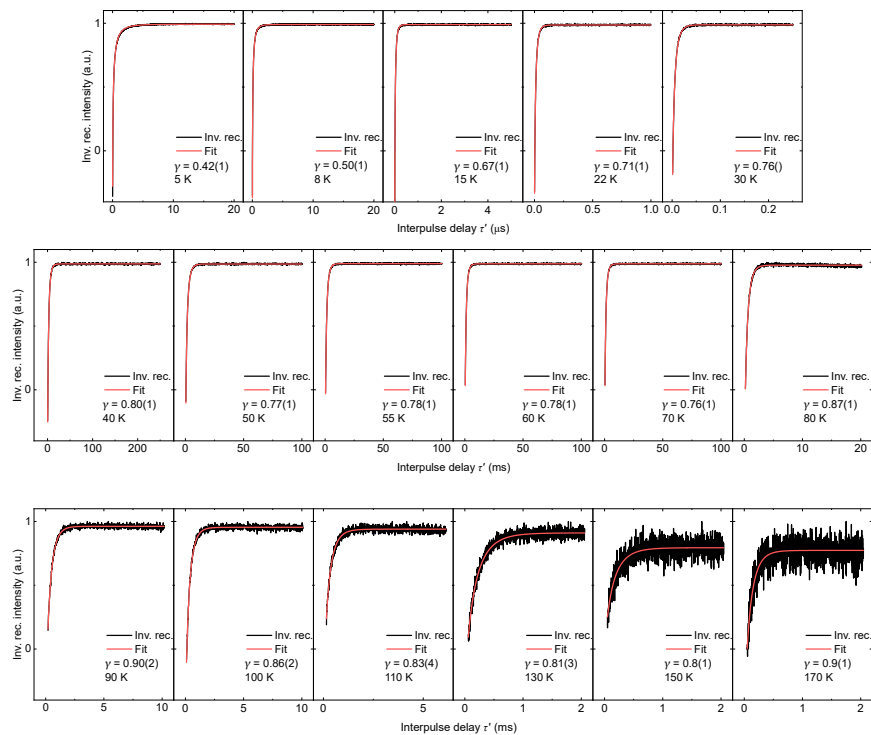

Figure S9: Inversion recovery data of MAPbCl<sub>3</sub>:Mn obtained at Q-band (1196.7 mT) frequency and different temperatures. Red curves indicate the best fits to a stretched exponential recovery function:  $V = a(1 - b \exp(-(\tau'/T_1)^\gamma))$ .

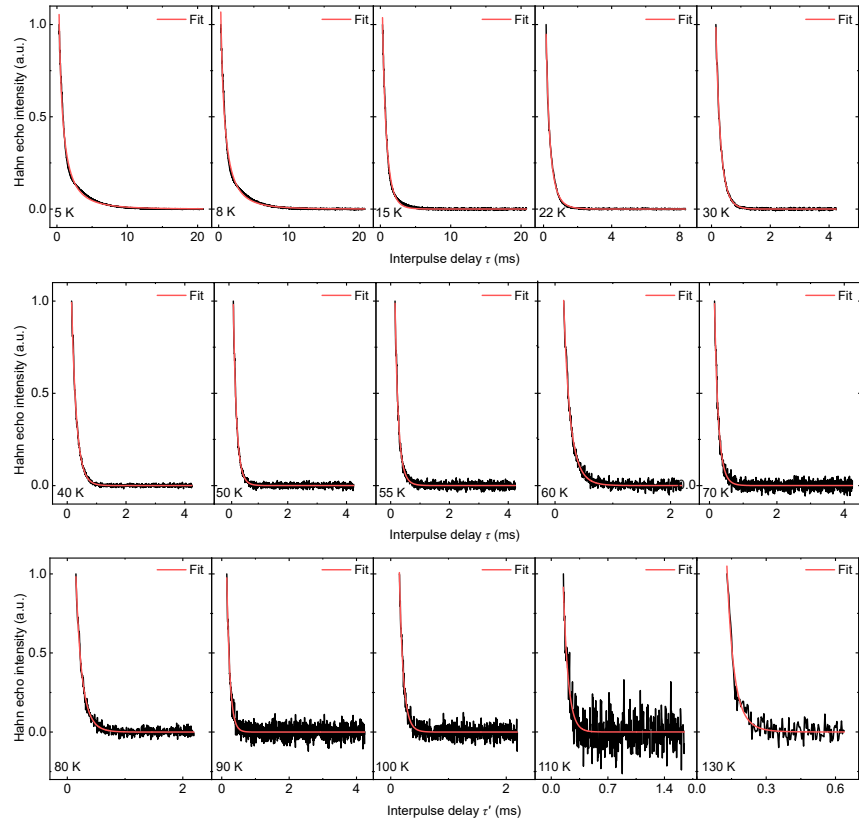

Figure S10: Hahn echo decays of  $\text{MAPbCl}_3\text{:Mn}$  obtained at X-band frequency (324.9 mT) and different temperatures. Red curves indicate the best fits to a stretched exponential decay model:  $V = a \exp(-(2\tau/T_2)^\gamma)$ .

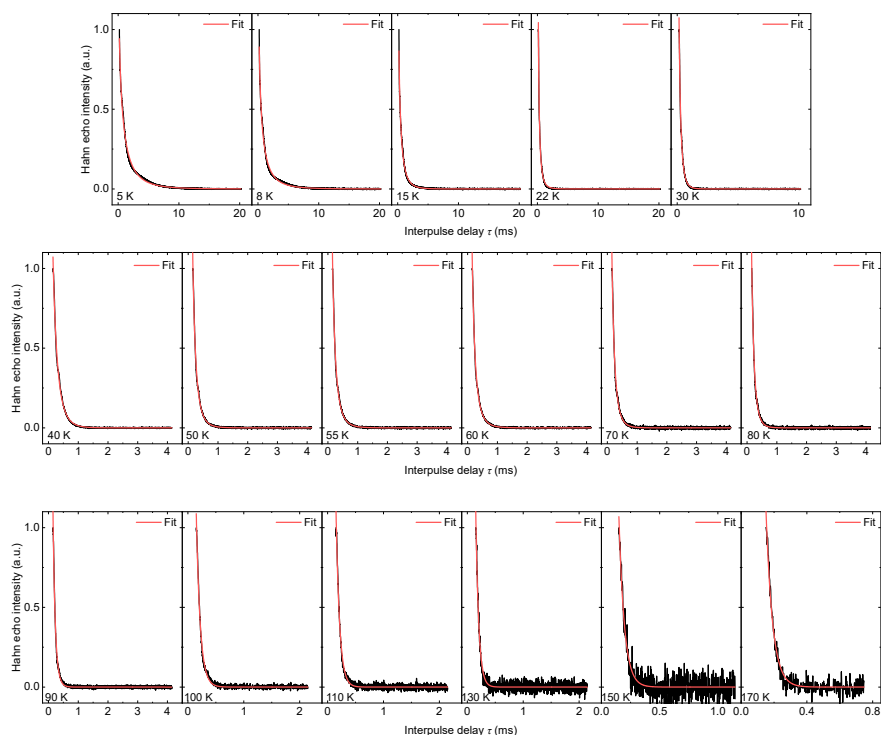

Figure S11: Hahn echo decays of MAPbCl<sub>3</sub>:Mn obtained at Q-band frequency (1196.7 mT) and different temperatures. Red curves indicate the best fits to a stretched exponential decay model:  $V = a \exp(-(2\tau/T_2)^\gamma)$ .

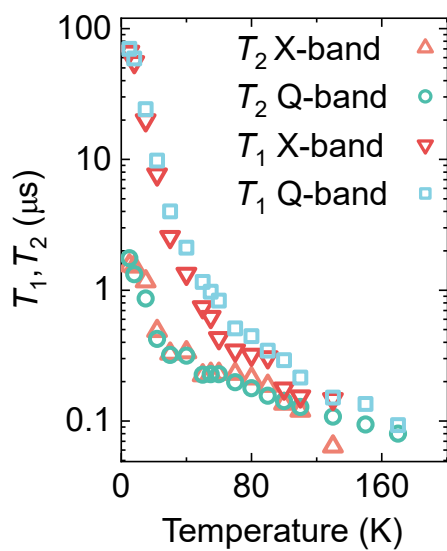

Figure S12: Temperature dependence of  $T_1$  and  $T_2$  times of MAPbCl<sub>3</sub>:Mn measured at X- and Q-band frequencies.

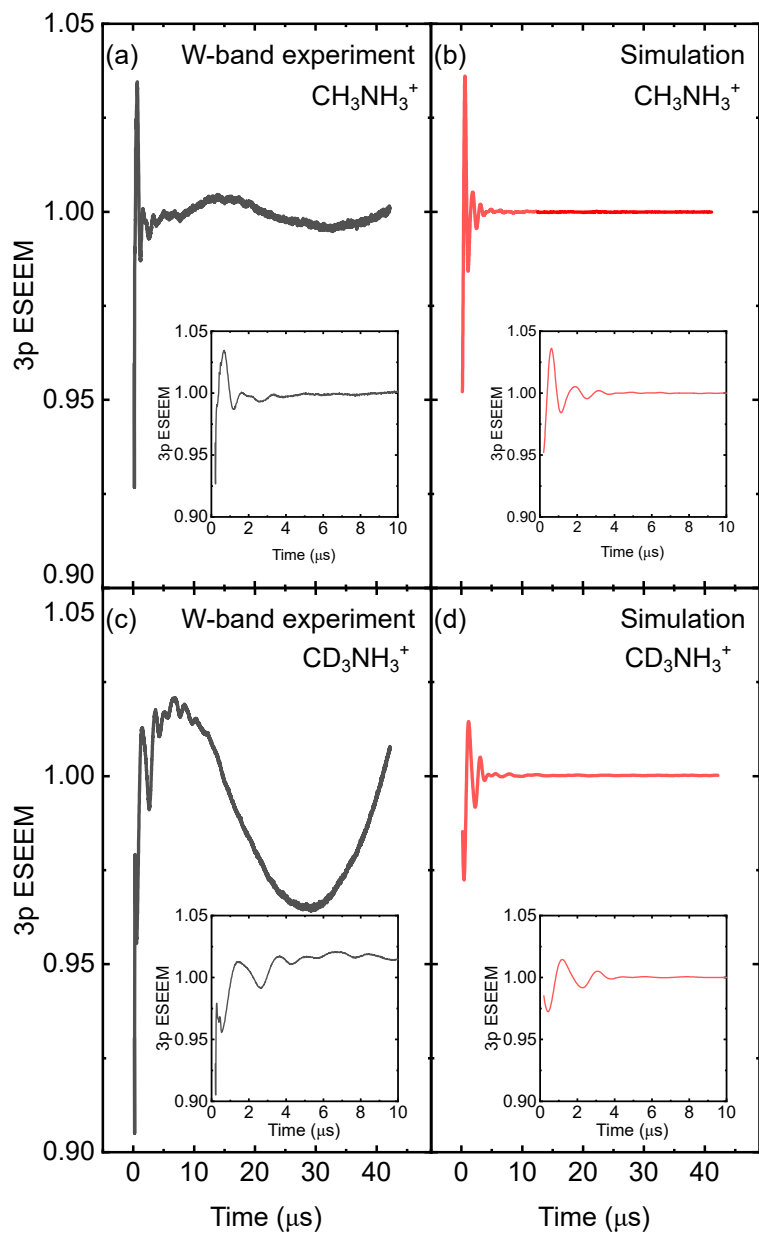

Figure S13: (a,c) Measured (8 K) and (b,d) simulated W-band 3p ESEEM time-domain traces of protonated and partially deuterated  $\text{MAPbCl}_3:\text{Mn}$ .

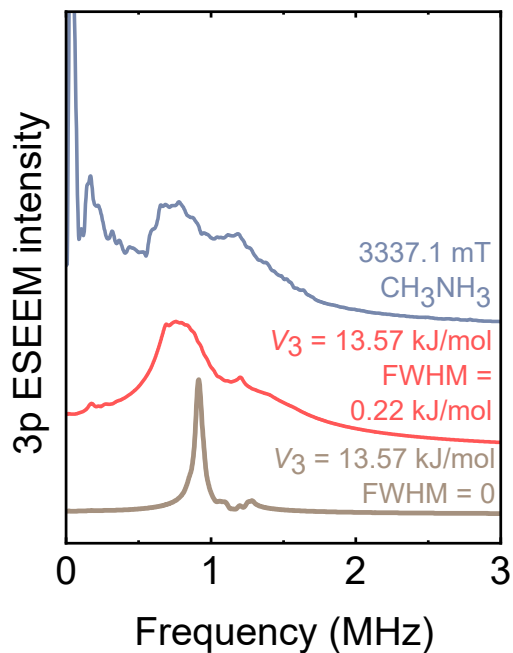

Figure S14: Simulation of the 3p ESEEM spectrum of MAPbCl<sub>3</sub>:Mn using single-valued ( $V_3 = 13.57$  kJ/mol) and distributed ( $V_3 = 13.57$  kJ/mol, FWHM = 0.22 kJ/mol) rotational barrier of NH<sub>3</sub> groups. The experimental spectrum is presented for comparison.

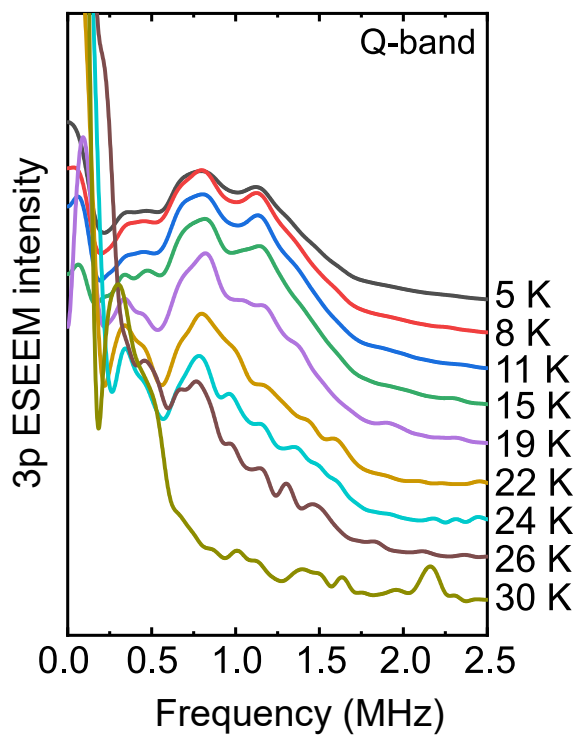

Figure S15: Temperature dependence of the 3p ESEEM spectrum of MAPbCl<sub>3</sub>:Mn obtained at Q-band (1194.8 mT) frequency.

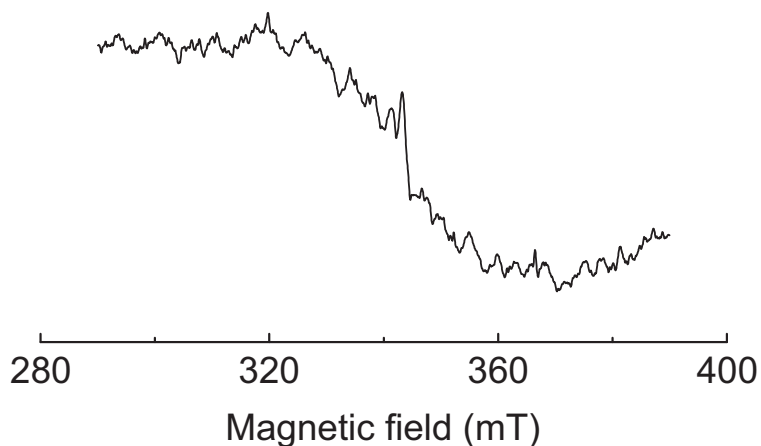

Figure S16: Room-temperature X-band CW EPR spectrum of MAPbI<sub>3</sub> mechanosynthesised with 1 mol% MnBr<sub>2</sub> showing unsuccessful incorporation of the Mn<sup>2+</sup> ions.

## References

- (1) Nandi, P.; Giri, C.; Swain, D.; Manju, U.; Topwal, D. Room Temperature Growth of CH<sub>3</sub>NH<sub>3</sub>PbCl<sub>3</sub> Single Crystals by Solvent Evaporation Method. *CrystEngComm* **2019**, *21*, 656–661.
- (2) Mączka, M.; Zienkiewicz, J. A.; Ptak, M. Comparative Studies of Phonon Properties of Three-Dimensional Hybrid Organic–Inorganic Perovskites Comprising Methylhydrazinium, Methylammonium, and Formamidinium Cations. *J. Phys. Chem. C* **2022**, *126*, 4048–4056.
